# Supplementary material
Source: Springer Nature journal article supplement (https://www.springermedizin.de/resource/supplementary/12990_2013_596_MOESM4_ESM.pdf/9613586)

**A**

Control

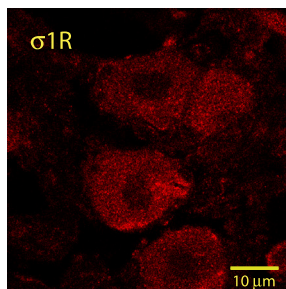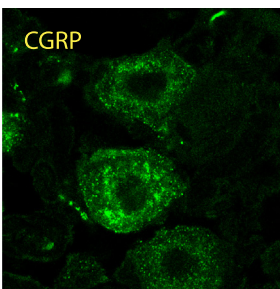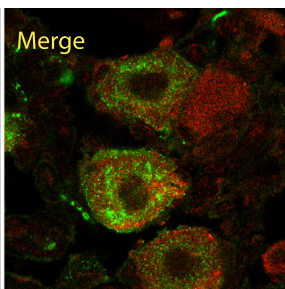

SNL L4

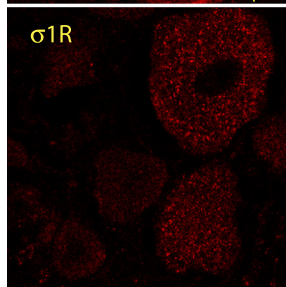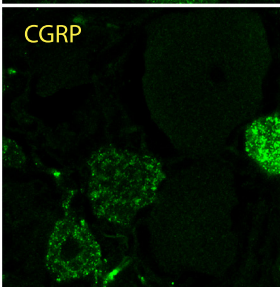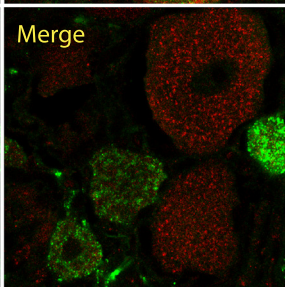

SNL L5

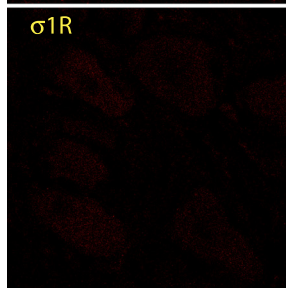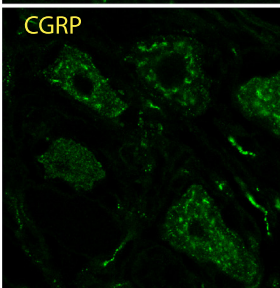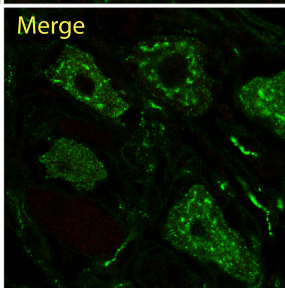**B**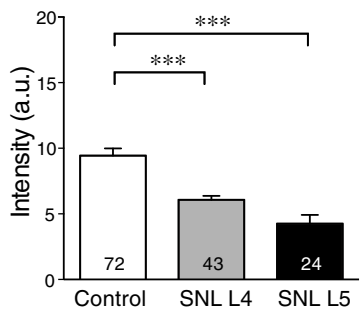

Supplement: MOESM4 [file 9613586]
